# Supplementary material for: Developmental Functions of miR156-Regulated SQUAMOSA PROMOTER BINDING PROTEIN-LIKE (SPL) Genes in Arabidopsis thaliana
Source: PubMed Central journal article supplement (PMC4991793; doi:10.1371/journal.pgen.1006263), 2016-08-19

S2 Fig

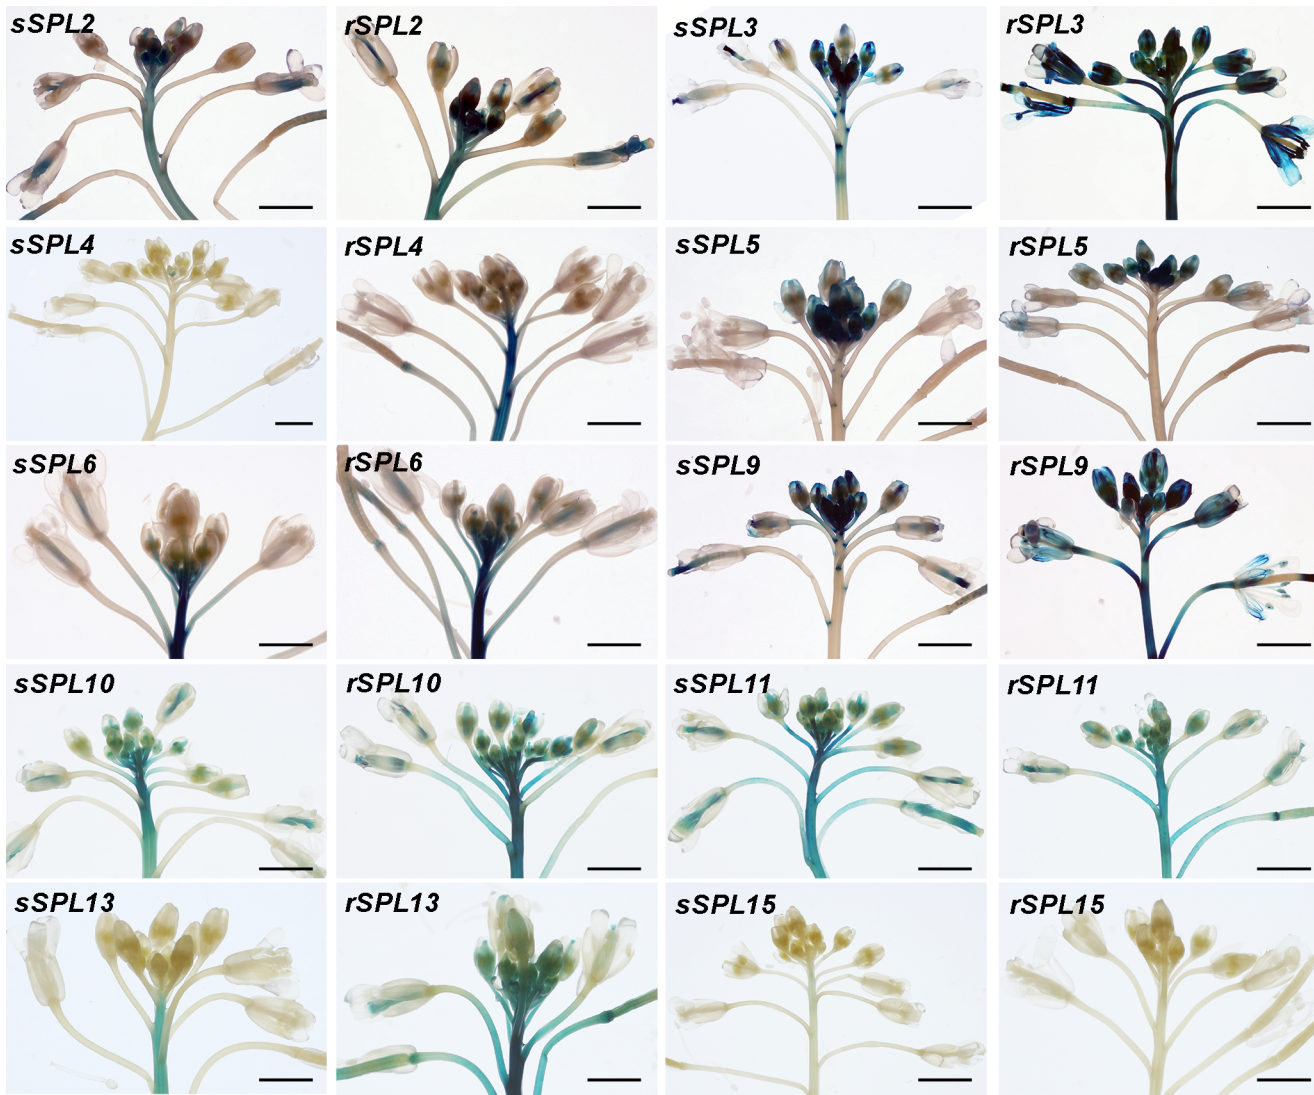

Supplement: pgen.1006263.s002.pdf [file pgen.1006263.s002.pdf]
