# Supplementary material for: Developmental Functions of miR156-Regulated SQUAMOSA PROMOTER BINDING PROTEIN-LIKE (SPL) Genes in Arabidopsis thaliana
Source: PubMed Central journal article supplement (PMC4991793; doi:10.1371/journal.pgen.1006263), 2016-08-19
Supplement: pgen.1006263.s008.pdf [file pgen.1006263.s008.pdf]

## S1 Table. miR156-target sites in SPL-GUS reporters

|              | Wild-type (miR156-sensitive) | miR156-resistant     |
|--------------|------------------------------|----------------------|
| <i>SPL2</i>  | gtgctctctctcttctgtca         | gagcactttcactcctttct |
| <i>SPL3</i>  | ttgcttactctcttctgtca         | tcagatgtgacgactgcatc |
| <i>SPL4</i>  | ctgctctctctcttctgtca         | ccagatgtgacgactgcatc |
| <i>SPL5</i>  | ccgctctctctcttctgtca         | ccagatgtgacgactgcatc |
| <i>SPL6</i>  | gtgctctctctcttctgtca         | gcgccctatccttgctttcc |
| <i>SPL9</i>  | gtgctctctctcttctgtca         | gcgcattgagcttgtaagc  |
| <i>SPL10</i> | gtgctctctctcttctgtca         | gcgcactgtcactactctct |
| <i>SPL11</i> | gtgctctctctcttctgtca         | gagcactgtcactactctct |
| <i>SPL13</i> | gtgctctctctcttctgtca         | gcgcattgtcgctccttagc |
| <i>SPL15</i> | gtgctctctctcttctgtca         | gtgcactttcactcctttct |
