# Supplementary material for: Developmental Functions of miR156-Regulated SQUAMOSA PROMOTER BINDING PROTEIN-LIKE (SPL) Genes in Arabidopsis thaliana
Source: PubMed Central journal article supplement (PMC4991793; doi:10.1371/journal.pgen.1006263), 2016-08-19
Supplement: pgen.1006263.s009.pdf [file pgen.1006263.s009.pdf]

**S2 Table: The phenotype of loss-of-function alleles of miR156-regulated *SPL* genes in LD**

|                               | Juvenile leaves          | Rosette leaves           | Cauline leaves          | Days to flower           | n  |
|-------------------------------|--------------------------|--------------------------|-------------------------|--------------------------|----|
| <b>Experiment 1</b>           |                          |                          |                         |                          |    |
| Col                           | 4.6 ± 0.1                | 10.8 ± 0.1               | N.D.                    | 26.3 ± 1.0               | 18 |
| <i>spl9-2</i>                 | 6.2 ± 0.2 <sup>a</sup>   | 12.3 ± 0.1 <sup>a</sup>  | N.D.                    | 24.4 ± 0.6               | 22 |
| <i>spl9-4</i>                 | 6.2 ± 0.1 <sup>a</sup>   | 13.2 ± 0.2 <sup>a</sup>  | N.D.                    | 24.7 ± 0.8               | 22 |
| <i>spl15-1</i>                | 5.3 ± 0.1                | 10.7 ± 0.1               | N.D.                    | 27.5 ± 0.9               | 22 |
| <i>spl15-2</i>                | 5.0 ± 0.1                | 11.8 ± 0.1 <sup>a</sup>  | N.D.                    | 25.7 ± 1.0               | 21 |
| <b>Experiment 2</b>           |                          |                          |                         |                          |    |
| Col                           | 5.1 ± 0.1                | 11.3 ± 0.3               | 3.0 ± 0.1               | 26.9 ± 0.3               | 23 |
| <i>spl10-2</i>                | 4.9 ± 0.1                | 11.0 ± 0.2               | 3.0 ± 0.1               | 25.7 ± 0.2               | 23 |
| <i>spl10-4</i>                | 5.0 ± 0.1                | 11.0 ± 0.2               | 3.1 ± 0.1               | 25.9 ± 0.2               | 23 |
| <i>spl11-1</i>                | 6.2 ± 0.2 <sup>a</sup>   | 11.8 ± 0.3               | 3.5 ± 0.2 <sup>a</sup>  | 26.8 ± 0.4               | 22 |
| <i>spl10-3/spl11-1</i>        | 6.4 ± 0.2 <sup>a</sup>   | 12.8 ± 0.2 <sup>a</sup>  | 3.8 ± 0.1 <sup>a</sup>  | 26.9 ± 0.2               | 24 |
| <b>Experiment 3</b>           |                          |                          |                         |                          |    |
| Col                           | 4.6 ± 0.1                | 10.3 ± 0.2               | 2.8 ± 0.1               | 26.0 ± 0.3               | 22 |
| <i>spl13-1</i>                | 5.5 ± 0.2 <sup>a</sup>   | 11.5 ± 0.3 <sup>a</sup>  | 2.7 ± 0.1               | 26.6 ± 0.2               | 23 |
| <i>spl13-2</i>                | 5.6 ± 0.2 <sup>a</sup>   | 10.8 ± 0.3               | 2.6 ± 0.1               | 26.5 ± 0.2               | 23 |
| <i>spl13-3</i>                | 5.5 ± 0.1 <sup>a</sup>   | 10.9 ± 0.2               | 2.9 ± 0.1               | 25.2 ± 0.3               | 23 |
| <i>spl9-4/spl15-1/spl13-1</i> | 14.8 ± 0.2 <sup>ab</sup> | 22.3 ± 0.5 <sup>a</sup>  | 3.1 ± 0.1               | 30.8 ± 0.3 <sup>a</sup>  | 40 |
| <i>spl9-4/spl15-1/spl13-3</i> | 14.8 ± 0.1 <sup>ab</sup> | 20.6 ± 0.3 <sup>a</sup>  | 2.5 ± 0.1               | 29.3 ± 0.2 <sup>a</sup>  | 22 |
| <b>Experiment 4</b>           |                          |                          |                         |                          |    |
| Col                           | 4.6 ± 0.1                | 11.0 ± 0.3               | 3.0 ± 0.1               | 28.0 ± 0.3               | 23 |
| <i>spl2-1</i>                 | 5.0 ± 0.1                | 11.2 ± 0.3               | 2.9 ± 0.1               | 27.7 ± 0.4               | 21 |
| <i>spl9-4</i>                 | 7.3 ± 0.1 <sup>a</sup>   | 13.0 ± 0.2 <sup>a</sup>  | 3.0 ± 0.1               | 28.0 ± 0.3               | 23 |
| <i>spl11-1</i>                | 5.4 ± 0.2 <sup>a</sup>   | 11.2 ± 0.3               | 3.5 ± 0.2               | 26.8 ± 0.4               | 21 |
| <i>spl13-1</i>                | 6.4 ± 0.2 <sup>a</sup>   | 12.2 ± 0.3 <sup>a</sup>  | 2.8 ± 0.1               | 28.0 ± 0.4               | 22 |
| <i>spl15-1</i>                | 4.4 ± 0.1                | 11.1 ± 0.3               | 2.7 ± 0.1               | 26.3 ± 0.4               | 21 |
| <i>spl2 spl9</i>              | 7.8 ± 0.2 <sup>a</sup>   | 13.2 ± 0.5 <sup>a</sup>  | 2.7 ± 0.2               | 28.2 ± 0.5               | 21 |
| <i>spl2 spl13</i>             | 6.6 ± 0.2 <sup>a</sup>   | 11.9 ± 0.3               | 2.6 ± 0.1               | 28.3 ± 0.4               | 22 |
| <i>spl2 spl9 spl11</i>        | 6.8 ± 0.1 <sup>a</sup>   | 11.9 ± 0.2               | 2.2 ± 0.1               | 25.8 ± 0.3               | 24 |
| <i>spl13 spl15</i>            | 5.5 ± 0.1 <sup>a</sup>   | 12.7 ± 0.4 <sup>a</sup>  | 3.5 ± 0.2               | 28.5 ± 0.5               | 24 |
| <i>spl2 spl13 spl15</i>       | 7.7 ± 0.2 <sup>a</sup>   | 16.4 ± 0.4 <sup>b</sup>  | 3.1 ± 0.1               | 29.7 ± 0.3               | 23 |
| <i>spl9 spl15</i>             | 8.2 ± 0.2 <sup>ab</sup>  | 16.5 ± 0.4 <sup>b</sup>  | 3.2 ± 0.1               | 30.2 ± 0.4 <sup>ab</sup> | 21 |
| <i>spl2 spl9 spl15</i>        | 9.2 ± 0.2 <sup>ab</sup>  | 18.8 ± 0.5 <sup>c</sup>  | 3.4 ± 0.1               | 29.8 ± 0.3 <sup>ab</sup> | 24 |
| <i>spl2 spl9 spl11 spl15</i>  | 8.4 ± 0.2 <sup>ab</sup>  | 16.3 ± 0.4 <sup>b</sup>  | 2.6 ± 0.1               | 28.5 ± 0.4               | 24 |
| <i>spl9 spl13</i>             | 12.9 ± 0.3 <sup>bc</sup> | 16.6 ± 0.4 <sup>b</sup>  | 2.9 ± 0.1               | 29.5 ± 0.6 <sup>ab</sup> | 21 |
| <i>spl2 spl9 spl13</i>        | 13.2 ± 0.3 <sup>bc</sup> | 16.7 ± 0.3 <sup>b</sup>  | 2.7 ± 0.1               | 29.0 ± 0.4 <sup>ab</sup> | 24 |
| <i>spl9 spl13 spl15</i>       | 18.9 ± 0.3 <sup>cd</sup> | 27.1 ± 0.6 <sup>cd</sup> | 4.1 ± 0.1 <sup>cd</sup> | 33.0 ± 0.3 <sup>cd</sup> | 23 |

<sup>a</sup> significantly greater than Col

<sup>b</sup> significantly greater than parents

<sup>c</sup> significantly greater than *sp19/15*

<sup>d</sup> significantly greater than *sp19/13*

N.D. Not determined
