# Supplementary material for: Developmental Functions of miR156-Regulated SQUAMOSA PROMOTER BINDING PROTEIN-LIKE (SPL) Genes in Arabidopsis thaliana
Source: PubMed Central journal article supplement (PMC4991793; doi:10.1371/journal.pgen.1006263), 2016-08-19
Supplement: pgen.1006263.s010.pdf [file pgen.1006263.s010.pdf]

**S3 Table: Flowering time of transgenic plants over-expressing miR156-resistant *SPL4*, or point mutations in this gene.**

| Lines                                     | Early flowering phenotype |        |      | # T1 plants |
|-------------------------------------------|---------------------------|--------|------|-------------|
|                                           | Strong                    | Medium | Weak |             |
| <i>35S::SPL4</i> <sup>a</sup>             | 39%                       | 50%    | 11%  | 28          |
| <i>35S::SPL4</i> $\Delta$ m1 <sup>b</sup> | 0%                        | 45%    | 55%  | 47          |
| <i>35S::SPL4</i> $\Delta$ m2 <sup>c</sup> | 16%                       | 54%    | 30%  | 63          |
| <i>35S::SPL4</i> $\Delta$ m3 <sup>d</sup> | 4%                        | 60%    | 37%  | 104         |

<sup>a</sup>*SPL4* with no miR156 target site, expressed under the regulation of the CaMV 35S promoter.

<sup>b</sup>*SPL4* $\Delta$  with the same point mutation as *spl4-1*

<sup>c</sup>*SPL4* $\Delta$  with the same point mutation as *spl4-2*

<sup>d</sup>*SPL4* $\Delta$  with the same point mutation as *spl4-3*
